# Supplementary material for: Generation of silent synapses in dentate gyrus correlates with development of alcohol addiction
Source: PubMed Central journal article supplement (PMC6098144; doi:10.1038/s41386-018-0119-4), 2018-06-15
Supplement: 41386_2018_119_MOESM1_ESM.pdf [file 41386_2018_119_MOESM1_ESM.pdf]

1 **Supplementary materials**

2 **Generation of silent synapses in dentate gyrus correlates with development of alcohol addiction**

3 **Anna Beroun<sup>1\*</sup>, Maria Nalberczak-Skóra<sup>1\*</sup>, Zofia Harda<sup>1,2</sup>, Małgorzata Piechota<sup>1</sup>,**  
4 **Magdalena Ziólkowska<sup>1</sup>, Anna Cały<sup>1</sup>, Roberto Pagano<sup>1</sup> and Kasia Radwanska<sup>1</sup>**

5 \*these authors contributed equally

6 <sup>1</sup>Department of Molecular and Cellular Neuroscience, the Nencki Institute of Experimental  
7 Biology of Polish Academy of Sciences, ul. L. Pasteura 3, Warsaw 02-093, Poland.

8 <sup>2</sup>currently at Department of Molecular Neuropharmacology, Institute of Pharmacology, Polish  
9 Academy of Sciences, ul. Smętna 12, Krakow 31-343, Poland.

10 Corresponding author: Kasia Radwanska, Ph.D., Laboratory of Molecular Basis of Behavior, the  
11 Nencki Institute of Experimental Biology of Polish Academy of Sciences, ul. L. Pasteura 3,  
12 Warsaw 02-093, Poland; e-mail: k.radwanska@nencki.gov.pl.

13

14 **Key words:** silent synapses, alcohol addiction, dentate gyrus, acamprosate, DREADDs, dendritic  
15 spines.

16

17

18

19

20

21

## 22 **Materials and Methods**

### 23 **Animal model of alcohol addiction in the IntelliCages.**

24 *IntelliCages.* After 1 week of acclimatization, the mice were injected (s.c.) with unique  
25 microtransponders (11.5 mm length, 2.2 mm diameter; Trovan, ID-100) under brief isoflurane  
26 anesthesia. The mice were then allowed to recover for 3 days, and the animals with properly  
27 located microtransponders were introduced to the IntelliCage system (NewBehavior AG, Zürich,  
28 Switzerland) (<http://www.newbehavior.com/>), 15 animals per system. The IntelliCage consists of  
29 a large standard rat cage (20.5 cm high, 40 cm x 58 cm at the top, 55 cm x 37.5 cm at the base).  
30 In each corner, a triangular learning chamber is located with two bottles. To drink, only one  
31 mouse can go inside a plastic ring (outer ring: 50 mm diameter; inner ring: 30 mm diameter; 20  
32 mm depth into outer ring) that ends with two 13 mm holes (one on the left, one on the right) that  
33 provide access to bottle nozzles. Each visit to the corner, nose-poke at the doors governing access  
34 to the bottles, and licks were recorded by the system and ascribed to a particular animal.

35 Mice underwent either short training (to study mice behavior during withdrawal and cue  
36 relapse) or full training (to identify addict and non-addict mice in five tests). The *short* training  
37 was composed of the following tests: (1) adaptation to a new cage (days 1-4); (2) initiation of  
38 alcohol drinking (days 5-17); (3) free alcohol access (days 18-90), (3) withdrawal (days 91-97);  
39 (4) cue-induced-relapse (day 98); (5) alcohol relapse (day 99); (6) free alcohol consumption (days  
40 100-115); (7) withdrawal (days 116-122); (8) cue-induced-relapse (day 122+90 min). Each test  
41 was programmed and turned on and off automatically, without intrusion of an experimenter, at  
42 the beginning of the dark phase.

43 The *full* training was composed of the following tests: (1) adaptation to a new cage (days 1-4);  
44 (2) initiation of alcohol drinking (days 5-17); (3) free alcohol access (days 18-68); (4) motivation  
45 to alcohol test (days 69-73); (5) free alcohol consumption (days 74-81); (6) persistence in alcohol

46 seeking test (days 82-84); (7) free alcohol consumption (days 85-91); (8) withdrawal (days 92-  
47 98); (9) cue-induced-relapse (day 99); (10) alcohol relapse (day 100); (11) free alcohol  
48 consumption (days 101-115); (12) withdrawal (days 115-122); (13) cue-induced-relapse (day  
49 122).

50 *Adaptation phase.* All mice had free access to all bottles with water in both active corners. All  
51 doors were open. After 24 hours, when all mice visited and licked from both corners, the doors  
52 were closed. Under fixed ratio of reinforcement (FR 1), each nose-poke was rewarded by a 5  
53 second access to the bottles with water.

54 *Initiation of alcohol consumption.* During the test, 2 corners were active, each with two bottles  
55 available. In one corner, the animals had access to water (“water corner”), and in the other  
56 (“reward corner”) animals had access to ethanol solution at increasing concentrations (4, 8, and  
57 12% ethanol changed every 3 days, prepared from 96% ethanol and tap water). When alcohol  
58 was available, it was signaled by a green light turn on in the “reward corner” each time a mouse  
59 entered the corner. All liquids were available under an FR1 schedule. The position of the “reward  
60 corner” was altered every 3 days. During *free alcohol access phases* mice had unlimited access to  
61 water in one corner and 4, 8 and 12% ethanol in the “reward corner” (each concentration tested  
62 for 3-5 days). Access to water and alcohol was under FR1. The position of the “reward corner”  
63 was altered every 3-5 days to assure that mice followed alcohol in whichever corner it was  
64 presented. 12% alcohol was chosen based on maximal alcohol consumption in g/kg/day during  
65 initiation of alcohol consumption. Daily alcohol consumption (g/kg/day) was calculated with the  
66 following formula: (number of licks of 12% alcohol per day x lick volume x 0.12 x 1 g/ml) /  
67 animal weight. To calculate the average lick volume, water consumption (in  $\mu$ l) was measured for  
68 3 consecutive days. The average volume of one lick was measured as total volume consumed /

69 number of licks. According to these calculations, an average lick volume was established as 1.94  
70  $\pm 0.2 \mu\text{l}$ . In the control groups, 5% sucrose (in tap water) or tap water was presented in the reward  
71 corner through the whole experiment.

72 *Motivation for alcohol tests.* During the test, two corners were active and available to animals.  
73 The animals had to perform an increasing number of nosepokes (2, 4, 8, 12, 16, 20, 24, 28, 32,  
74 and 36) spaced by less than 1 s during one visit to open the door and be allowed for a 5 s access  
75 to the reward bottles. The number of required instrumental responses (nosepokes) increased when  
76 an animal performed 10 sets of responses of a given ratio. The tests were terminated when 90%  
77 of animals did not change FR level during the last 24 hours. The FR level reached during the test  
78 was used as an index of motivation.

79 *Persistence in reward seeking tests.* The persistence in reward seeking was measured as a number  
80 of reward nosepokes during signaled “no-reward” periods (nR). “Reward” periods (R) were  
81 signaled by the green cue light in the reward corner. During the “reward” periods, nosepokes at  
82 all doors opened the door for 5 s (FR 1). The “no-reward” periods were signaled by elimination  
83 of the green cue light. During the “no-reward” periods, nose-pokes on the reward side were not  
84 followed by any scheduled consequences. Each persistence test lasted 3 days, starting at the  
85 beginning of the light phase and was composed of six, 6-hour long “reward periods” (R) altered  
86 with 6-hour long “no-reward periods” (nR). Number of “reward” nose-pokes performed during  
87 the test, as well as ratio of nose-pokes performed during no-reward to reward periods were used  
88 as an index of persistence.

89 *Alcohol withdrawal followed by cue and alcohol relapse.* The withdrawal periods were signaled  
90 as the “no-reward” periods and lasted 7 days. Door to reward was closed and nosepokes to the  
91 reward corner were without scheduled consequences. Each withdrawal was followed by a 24-

92 hour cue-relapse. A green cue light (reward-associated cue) in the reward corner was presented  
93 each time a mouse entered the reward corner. However, nose-pokes to the reward doors had no  
94 scheduled consequences. Number of nosepokes performed in “reward corner” was used as an  
95 index of cue-induced relapse. This test was followed by reward relapse when bottles with reward  
96 (alcohol or sucrose) were added into the active “reward corner”. During the test each nose-poke  
97 into reward door opened the door for 5 s. Amount of reward drank during the first day of relapse  
98 (number of licks) was used as an index of relapse.

99 For the electrophysiological analysis, all mice were trained according to the same protocol  
100 till the last free access period. The length of the last alcohol consumption period was adjusted for  
101 each mouse (from 15 to 30 days) so only one mouse per day finished the training and was used  
102 for electrophysiological recordings. The length of the last free access period was balanced  
103 between the experimental groups.

#### 104 **Electrophysiology.**

105 Mice were anesthetized with isoflurane and decapitated. The brains were cut in half. One  
106 hemisphere was used for electrophysiological recordings, another for DiI staining. For  
107 electrophysiological recordings, acute, 250  $\mu\text{m}$ -thick slices were prepared using Leica VT1000S  
108 vibratome in ice-cold NMDG cutting solution (135 mM N-methyl-D-glucamine, 1 mM KCl, 1.2  
109 mM  $\text{KH}_2\text{PO}_4$ , 1.5 mM  $\text{MgCl}_2$ , 0.5 mM  $\text{CaCl}_2$ , 20 mM choline bicarbonate, 10 mM D-glucose (all  
110 chemicals purchased from Sigma)). Slices containing hippocampus were collected and  
111 transferred to ACSF solution (119 mM NaCl, 2.5 mM KCl, 1 mM  $\text{NaH}_2\text{PO}_4$ , 26 mM  $\text{NaHCO}_3$ ,  
112 1.3 mM  $\text{MgCl}_2$ , 2.5 mM  $\text{CaCl}_2$  and 10 mM D-glucose (all chemicals purchased from Sigma)) at  
113 RT and incubated for 1h. All solutions were bubbled with carbogene (95%  $\text{O}_2$ , 5%  $\text{CO}_2$ ). Patch-  
114 clamp technique was used to analyze silent synapses as previously described (Stefaniuk *et al*,  
115 2017). Slices were transferred to the recording chamber, perfused with ACSF solution heated up

116 to 31°C. Stimulating electrode (septum theta glass capillary with two chlorinated silver wires)  
117 was placed in the perforant path. Granule cells of the upper blade of dorsal DG were identified  
118 visually and patched with borosilicate glass capillaries (4-6 MΩ resistance) filled with internal  
119 solution (130 mM Cs gluconate, 20 mM HEPES, 3 mM TEA-Cl, 0.4 mM EGTA, 4 mM Na<sub>2</sub>ATP,  
120 0.3 mM NaGTP, and 4 mM QX-314Cl, pH = 7.0-7.1, osmolarity: 290-295 mOsm). Series and  
121 input resistances were monitored throughout the experiment. Electrical stimulation was elicited  
122 by TTL pulse every 5 s. Recorded currents were filtered at 2 kHz (npi amplifiers) and digitized at  
123 10 kHz (ITC-18 InstruTECH/HEKA). All recordings were performed in the presence of 50 μM  
124 picrotoxin (Abcam) in ACSF, to pharmacologically block inhibitory neurotransmission and focus  
125 on excitatory pathway specifically.

126 *Frequency of silent synapses:* for assessing the frequency of silent synapses on the neurons in  
127 DG, the minimal stimulation protocol was used (Huang *et al*, 2009; Liao *et al*, 1995). The  
128 strength of the electric pulse was decreased and adjusted to obtain both responses and failures of  
129 AMPAR- and NMDAR-mediated EPSCs, recorded at -60 and +45 mV respectively. The noise  
130 level of our recording setup allows to clearly distinguish responses as small as 5 pA above the  
131 baseline. This is a crucial matter, as successes and failures are distinguished visually. During data  
132 analysis, the experimenter was blinded to the experimental groups. The percentage of silent  
133 synapses was calculated from the following equation:

134 
$$\% \text{ silent synapses} = 1 - \ln F_{-60\text{mV}} / \ln F_{+45\text{mV}},$$

135 where  $F_{-60\text{mV}}$  and  $F_{+45\text{mV}}$  are failure rates at -60 mV and +45 mV respectively.

136

137 **DREADD experiment.**

138 Mice were anaesthetized with isoflurane (5% for induction, 1.5-2.0% after) in the  
139 stereotaxic frame for the entire surgery and their body temperatures were maintained using a  
140 heating pad. We bilaterally injected into dorsal DG (stereotactic coordinates from bregma: ML,  
141  $\pm 1.0$  mm; AP, -2.0mm; DV, -2.0mm) adeno-associated viral vectors (AAV, serotype 1 and 2)  
142 coding inhibitory and activatory designer receptors exclusively activated by designer drugs  
143 (DREADD) (9) (pAAV-hSyn-HA-hM4D(Gi)-mCherry, Addgene Plasmid #50475; pAAV-hSyn-  
144 HA-hM3D(Gq)-mCherry, Addgene Plasmid #50474) (0.5  $\mu$ l/ site, viral titer  $1.30-1.9 \times 10^9/\mu$ l) or  
145 control mCherry (pAAV-CaMKIIa-mCherry (0.5  $\mu$ l/ site, viral titer  $1.35 \times 10^9/\mu$ l). The viruses  
146 were prepared by Animal Model Core Facility at Nencki Institute. The viruses were infused by a  
147 glass capillary (disposable BLAUBRAND micropipettes, intraMark) mounted to the custom-  
148 made pump attached to the Digital New Standard Stereotaxic system from Stoelting (51500D).

149 After surgery, animals were allowed to recover for 14 days before the training in the  
150 IntelliCages. After the initial period of free access to alcohol (day 1-30), the training was  
151 composed of the following phases: withdrawal 1 (day 31-37); cue relapse 1 (day 38); free access  
152 to alcohol (day 39-90); withdrawal 2 (day 91-97) and cue relapse 2 (day 98); free access to  
153 alcohol (day 99-105). Animals were injected with saline 20 minutes before the first cue relapse.  
154 Next, mice were injected with CNO (0.5 mg/kg in saline) or saline 20 minutes before second cue  
155 relapse. Mice were split into CNO and saline groups, based on their performance during the cue  
156 relapse 1 (alcohol seeking during the first cue relapse did not differ between the groups).

157 At the end of the behavioral training, mice were anesthetized and perfused (PBS/4%PFA).  
158 Next the brains were immersed in antifreeze solution (15% sucrose, 30% ethylene glycol in PBS  
159 with NaNO<sub>3</sub>) and cut on a cryostat (Leica CM1850) in 40- $\mu$ m thick sections. Sections from  
160 dorsal hippocampus were mounted on slides and covered with DAPI Fluoromount-G

161 (Southernbiotech, 00-4959-52). Zeiss Spinning Disc confocal microscope (lens: 63x oil  
162 immersion, pixel size: 132x132x260 nm) was used to photograph the dorsal hippocampus and  
163 assess the extent of the expression of the viruses. Due to the lack of visible viral expression, one  
164 animal was excluded from the behavioral analysis.

165

### 166 **Immunostaining**

167 Mice were anesthetized (i.p. sodium pentobarbital; 50 mg/kg) and perfused transcardially with  
168 phosphate-buffered saline (PBS (Medicago), 3 min at RT), followed by 4 % paraformaldehyde  
169 (PFA, Sigma-Aldrich), 6 min at RT. Brains were removed and placed in 4% PFA at 4° C for 24  
170 hours and next in 30% sucrose at 4° C until sunk. Coronal sections (40 µm) were cut on cryostat  
171 (Cryostats Leica CM1950) and stored at -20° C in PBSAF [PBS, 20% sucrose (Sigma–Aldrich),  
172 15% ethylene glycol (Sigma–Aldrich), 0.05% NaN<sub>3</sub> (Sigma–Aldrich)]. The slices were incubated  
173 overnight at 4°C with primary antibody directed against P-T286-CaMKII (R&D Systems,  
174 PPS002, 1:500) and PSD95 (Millipore, MAB1598, 1:500) in 5% normal donkey serum in 0.3%  
175 Triton in PBS. Next day slices were washed in 0.3% Triton X-100 in PBS and incubated with  
176 secondary antibody bound with Alexa Fluor 555 (Invitrogen, A21447, 1:500), or Alexa Fluor 647  
177 (Invitrogen, A31570. 1:500). Finally, the sections were washed in PBS and mounted on slides.

178

### 179 **Microscopy and image analysis**

180 The immunostaining was photographed with Leica SP5 microscope (63x oil immersion objective  
181 and 1.66x digital zoom), equipped with digital camera. Every sixth section through DG (approx..  
182 6 sections per animal) were photographed bilaterally with the same microscope settings. Images  
183 were analyzed using Fiji software. Intensity of the staining was measured using mean grey value



184 parameter (MGV) for 8-bit images ranging from 0 to 255. All microphotographs were analyzed  
185 by a person blind to the experiment groups.

186

187 **Data analysis.**

188 The results are expressed as mean  $\pm$  SEM. Differences between groups were considered  
189 significant at  $p < 0.05$ . The statistical analysis of data was performed in GraphPad Prism. The  
190 information on statistical tests is in figures legends.

191

192

193

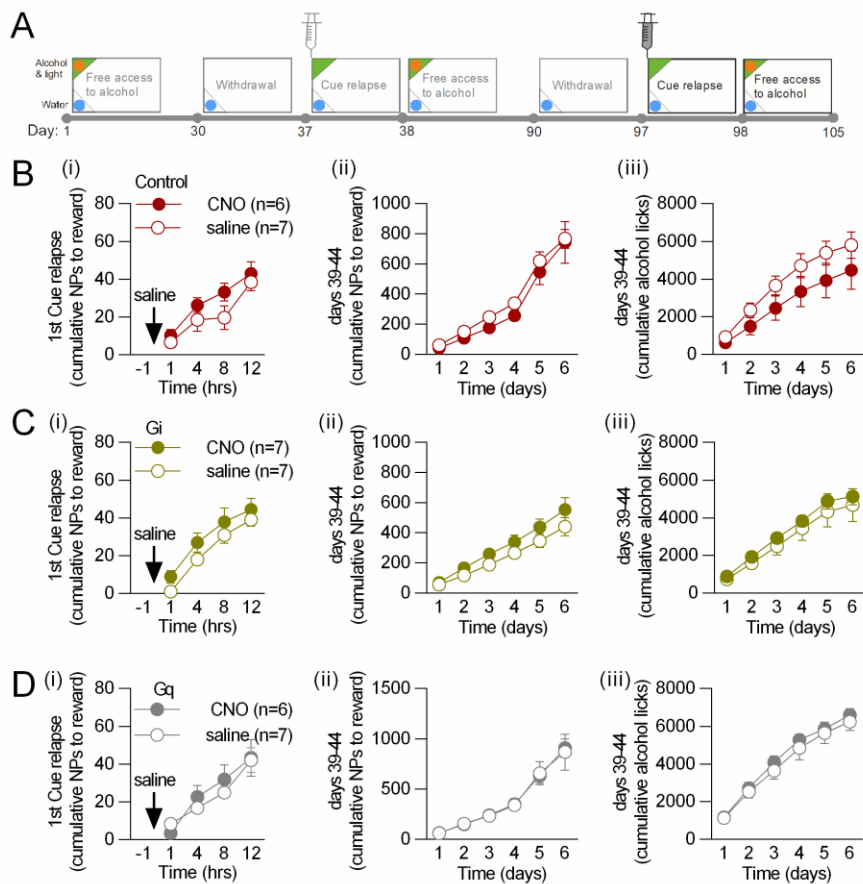

195

196 **Supplementary Figure 1. DREADD expression had no effect on mice behaviour during the**

197 **first cue relapse and the following period of free access to alcohol.**

198 (A) Experimental timeline. Before the first cue relapse all mice were injected with saline. “CNO”

199 groups were injected with CNO only before 2<sup>nd</sup> cue relapse (see Fig. 3).

200 (B) There was no difference between “CNO” and “saline” groups of mCherry-expressing mice in

201 alcohol seeking during the first cue relapse (i); and the following period of free access to alcohol

202 (ii-iii).

203 **(C)** There was no difference between “CNO” and “saline” groups of Gi-expressing mice in  
204 alcohol seeking during the first cue relapse (i); and the following period of free access to alcohol  
205 (ii-iii).

206 **(D)** There was no difference between “CNO” and “saline” groups of Gq-expressing mice in  
207 alcohol seeking during the first cue relapse (i); and the following period of free access to alcohol  
208 (ii-iii).

209

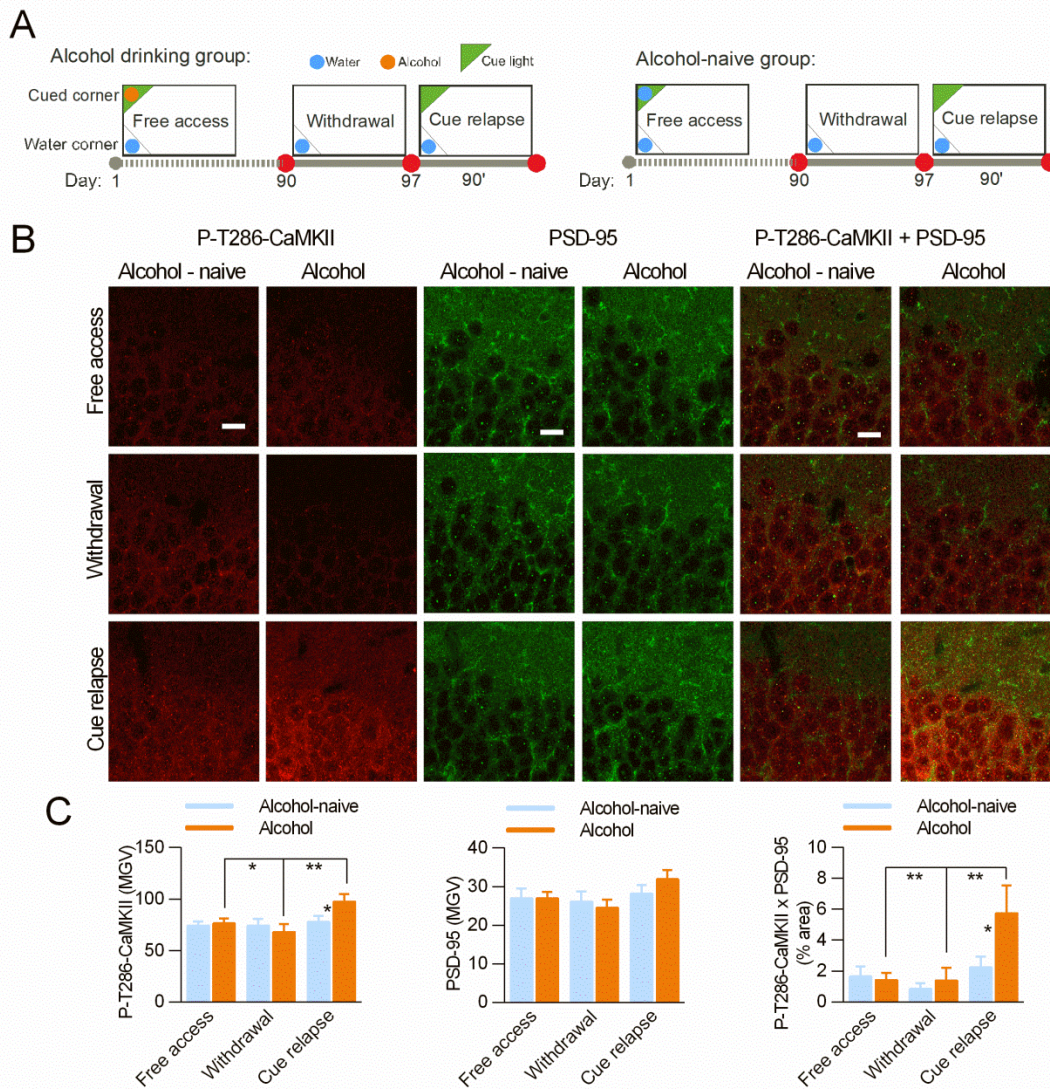

210

211 **Supplementary Figure 2. Cue relapse increases the levels of P-T286-CaMKII in DG.**

212 (A) Experimental timeline and IntelliCage setups for alcohol drinking and alcohol-naïve mice.

213 Mice went through period of free access to alcohol (90 days), withdrawal (7 days) and cue

214 relapse (90 min). Two groups of alcohol drinking (n=7) and naïve mice (n=7) were sacrificed

215 after each stage of the training (black dots) (N=42). The brain section were prepared to perform

216 immunostaining.

217 (B) Representative microphotographs of the upper blade (granular and molecular layer) of dorsal  
218 DG fluorescent immunostaining performed with specific antibodies recognizing  
219 autophosphorylated calcium and calmodulin-dependent kinase (P-T286-CaMKII) (used as a  
220 marker of ongoing synaptic plasticity (Giese et al. 1998; Shonesy et al. 2014; Coultrap et al.  
221 2014) and synaptic marker, PSD95 (Broadhead et al. 2016). Scale bars, 100  $\mu$ m.

222 (C) Summary of data showing that presentation of alcohol-, but not water-, associated cues  
223 increases the levels of P-T286-CaMKII (2-way ANOVA, training:  $F(2, 33)=3.748$ ,  $P=0.034$ ,  
224 alcohol:  $F(1, 33)=1.008$ ,  $P=0.322$ ), and colocalization of P-T286-CaMKII with PSD95 (training:  
225  $F(2, 32)=5.802$ ,  $P=0.007$ , alcohol:  $F(1, 32)=2.996$ ,  $P=0.093$ ), but has no effect on PSD95  
226 expression (training:  $F(2, 33)=2.141$ ,  $P=0.133$ ; alcohol:  $F(1, 33)=0.1427$ ,  $P=0.708$ ) . $*p<0.05$ ,  
227  $**p<0.01$  by Tukey's multiple comparisons test

228

229

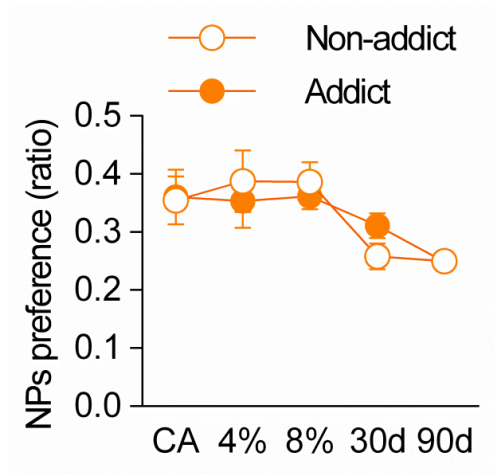

230

231 **Supplementary Figure 3. Non-addict and addict mice do not differ in nose-poke preference**  
 232 **for the reward corner.** RM ANOVA, addiction index:  $F(1, 174)=0.0001$ ,  $p=0.9900$ . CA, cage  
 233 adaptation; 4% & 8%, alcohol initiation; 30d, the first 30 days of free access to alcohol; 90d, free  
 234 access to alcohol, days 31-90.

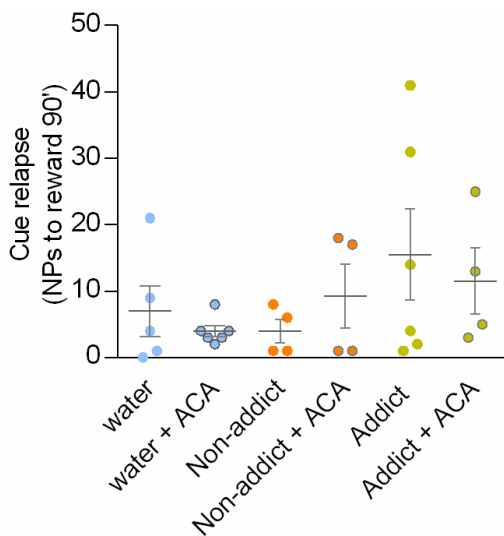

235

236 **Supplementary Figure 4. Acamprosate does not affect alcohol seeking during initial 90**  
 237 **minutes of cue relapse.** ACA, acamprosate. Kruskal-Wallis test,  $H=2.833$ ,  $p=0.725$ .

238

239 **Literature**

240 Broadhead MJ, Horrocks MH, Zhu F, et al (2016) PSD95 nanoclusters are postsynaptic building  
241 blocks in hippocampus circuits. *Sci Rep* 6:24626 . doi: 10.1038/srep24626

242 Coultrap SJ, Freund RK, O'Leary H, et al (2014) Autonomous CaMKII mediates both LTP and  
243 LTD using a mechanism for differential substrate site selection. *Cell Rep* 6:431–7 . doi:  
244 10.1016/j.celrep.2014.01.005

245 Giese KP, Fedorov NB, Filipkowski RK, Silva a J (1998) Autophosphorylation at Thr286 of the  
246 alpha calcium-calmodulin kinase II in LTP and learning. *Science* 279:870–873 . doi:  
247 10.1126/science.279.5352.870

248 Shonesy BC, Jalan-Sakrikar N, Cavener VS, Colbran RJ (2014) CaMKII: A molecular substrate  
249 for synaptic plasticity and memory. *Prog Mol Biol Transl Sci* 122:61–87 . doi:  
250 10.1016/B978-0-12-420170-5.00003-9

251

252
